# Supplementary material
Source: Research Square preprint supplement (doi:10.21203/rs.3.rs-8808792/v1)
Supplement: Supplementary file 1 [file 85b00931d43aa02c02d4d95d.docx]

**S1 Table. The information of 306 wheat germplasm accessions**

| **No.** | **Variety (Strain) Name** | **Type** | **Source** | **No.** | **Variety (Strain) Name** | **Type** | **Source** |
| --- | --- | --- | --- | --- | --- | --- | --- |
| 1 | A11P6 | High-Generation Wheat Lines | Henan | 41 | KPL-4 | High-Generation Wheat Lines | Shaanxi |
| 2 | Xinmai9 | Cultivar | Henan | 42 | Jinan32 | Cultivar | Shandong |
| 3 | A309 | High-Generation Wheat Lines | Ningxia | 43 | Wo9703A315 | Cultivar | Anhui |
| 4 | Kechengmai7 | Cultivar | Sichuan | 44 | CL0401 | High-Generation Wheat Lines | Shandong |
| 5 | Nannong9918 | Cultivar | Jiangsu | 45 | Liangxing99-1 | Cultivar | Shandong |
| 6 | Zhongmai133 | Cultivar | Beijing | 46 | Xinong501 | Cultivar | Shaanxi |
| 7 | Lian75006 | Cultivar | Jiangsu | 47 | Xinong889 | Cultivar | Shaanxi |
| 8 | Xiamai55 | Cultivar | Ningxia | 48 | Linxuan6109 | Cultivar | Inner Mongolia |
| 9 | Chuanmai93 | Cultivar | Sichuan | 49 | Jimai06039 | Cultivar | Shandong |
| 10 | Heng10-5218 | Cultivar | Hebei | 50 | B215-1-1 | Cultivar | Henan |
| 11 | Ke0901 | Cultivar | Beijing | 51 | Hei176 | Cultivar | Heilongjiang |
| 12 | 009-2 | High-Generation Wheat Lines | Inner Mongolia | 52 | M09-853 | High-Generation Wheat Lines | Henan |
| 13 | Zhengmai113 | Cultivar | Henan | 53 | Mianyang06-367 | Cultivar | Sichuan |
| 14 | Chuanfu9 | Cultivar | Sichuan | 54 | Ruixing1101 | Cultivar | Henan |
| 15 | Chuanmai125 | Cultivar | Sichuan | 55 | Chuanmai604 | Cultivar | Sichuan |
| 16 | Ximai2 | Cultivar | Ningxia | 56 | Zhongyu885 | Cultivar | Beijing |
| 17 | Sm-14 | Cultivar | Inner Mongolia | 57 | Gaoda1 | Cultivar | Shaanxi |
| 18 | Shenmai1 | Cultivar | Henan | 58 | Ermaike608 | Cultivar | Shaanxi |
| 19 | Ji5265 | Cultivar | Hebei | 59 | Xumai9169 | High-Generation Wheat Lines | Jiangsu |
| 20 | Keshan14-103 | Cultivar | Heilongjiang | 60 | BTYC7-1-1 | High-Generation Wheat Lines | Shaanxi |
| 21 | Keshan14-446 | Cultivar | Heilongjiang | 61 | Qinfeng18 | Cultivar | Shaanxi |
| 22 | Longmai15-5049 | Cultivar | Heilongjiang | 62 | Mengmai032 | Cultivar | Henan |
| 23 | Keshan14-1016 | Cultivar | Heilongjiang | 63 | Xiaoyan58 | Cultivar | Shaanxi |
| 24 | Keshan14-772 | Cultivar | Heilongjiang | 64 | Yunhan602 | Cultivar | Shanxi |
| 25 | Keshan14-1019 | Cultivar | Heilongjiang | 65 | Beimai6 | Cultivar | Heilongjiang |
| 26 | Longmai14H4062 | High-Generation Wheat Lines | Heilongjiang | 66 | L56487 | High-Generation Wheat Lines | Shanxi |
| 27 | Keshan14-1072 | High-Generation Wheat Lines | Heilongjiang | 67 | Yunchun1012 | Cultivar | Shanxi |
| 28 | Yunnanmai | Cultivar | Yunnan | 68 | Xiaoyan16 | Cultivar | Shaanxi |
| 29 | Gang09-558 | Cultivar | Inner Mongolia | 69 | Ningchun61 | Cultivar | Ningxia |
| 30 | Kenda16 | Cultivar |  | 70 | Xinong6151 | Cultivar | Shaanxi |
| 31 | Longmai-long33 | Cultivar | Heilongjiang | 71 | Yimai1 | Cultivar | Shaanxi |
| 32 | Kechun4 | Cultivar | Heilongjiang | 72 | Yunhan618 | Cultivar | Shanxi |
| 33 | Jiusan14-50661 | Cultivar | Heilongjiang | 73 | Zhisheng998 | Cultivar | Hebei |
| 34 | Longmai14-4762 | Cultivar | Heilongjiang | 74 | Fumai2 | Cultivar | Hebei |
| 35 | Wanmai19 | Cultivar | Anhui | 75 | Chuanmai37 | Cultivar | Sichuan |
| 36 | Xiaheyinbai | Cultivar | Gansu | 76 | Jingai21 | Cultivar | Hubei |
| 37 | Yanzhan4110 | Cultivar | Henan | 77 | S139 | High-Generation Wheat Lines | Inner Mongolia |
| 38 | Ningchun50 | Cultivar | Ningxia | 78 | Chuanmai602 | Cultivar | Sichuan |
| 39 | Zhou26-1 | Cultivar | Henan | 79 | Zhoumengmai288 | Cultivar | Henan |
| 40 | Zhouyou102 | Cultivar | Henan | 80 | CIKO | High-Generation Wheat Lines | Inner Mongolia |

**S1 Table. The information of 306 wheat germplasm accessions. (Continued)**

| **No.** | **Variety (Strain) Name** | **Type** | **Source** | **No.** | **Variety (Strain) Name** | **Type** | **Source** |
| --- | --- | --- | --- | --- | --- | --- | --- |
| 81 | Wuhanmai | Cultivar | Hubei | 120 | B2740 | High-Generation Wheat Lines | Inner Mongolia |
| 82 | Nannong9918 | High-Generation Wheat Lines | Jiangsu | 121 | Neimai9 | Cultivar | Sichuan |
| 83 | Zhoumai66 | Cultivar | Henan | 122 | Xikemai2 | Cultivar | Sichuan |
| 84 | ML2651 | High-Generation Wheat Lines | Henan | 123 | Emai51099 | Cultivar | Hubei |
| 85 | Nannong037-57 | Cultivar | Jiangsu | 124 | Xiangmai19 | Cultivar | Hubei |
| 86 | Fumai18 | Cultivar | Anhui | 125 | Jingmai1 | Cultivar | Hubei |
| 87 | Hongyumai2 | Cultivar | Hebei | 126 | Chuanmai58 | Cultivar | Sichuan |
| 88 | Zhengmai103 | High-Generation Wheat Lines | Henan | 127 | Chuannong23 | Cultivar | Sichuan |
| 89 | Chuanyu55871 | Cultivar | Sichuan | 128 | Liangmai3 | Cultivar | Sichuan |
| 90 | Shi6678 | High-Generation Wheat Lines | Hebei | 129 | SW20812 | High-Generation Wheat Lines | Inner Mongolia |
| 91 | Ningchun55 | Cultivar | Ningxia | 130 | Chuanyu20 | Cultivar | Sichuan |
| 92 | Xinnong518 | High-Generation Wheat Lines | Anhui | 131 | Jingzhuan2 | Cultivar | Hubei |
| 93 | Shanqianmai2 | Cultivar | Beijing | 132 | Shumai375 | Cultivar | Sichuan |
| 94 | LIAVA Yi | High-Generation Wheat Lines | Inner Mongolia | 133 | Shuomai482 | Cultivar | Sichuan |
| 95 | A230 | High-Generation Wheat Lines | Inner Mongolia | 134 | Emai504060 | Cultivar | Hubei |
| 96 | Guinong07 | Cultivar | Guizhou | 135 | Xinchun15 | Cultivar | Xinjiang |
| 97 | Sm-10 | High-Generation Wheat Lines | Inner Mongolia | 136 | Chuanyu18 | Cultivar | Sichuan |
| 98 | Bao3611 | Cultivar |  | 137 | Chuanmai52 | Cultivar | Sichuan |
| 99 | Gan7050A323 | Cultivar | Gansu | 138 | Chuanmai41 | Cultivar | Sichuan |
| 100 | Anke1601 | Cultivar | Anhui | 139 | Emai10 | Cultivar | Hubei |
| 101 | Zhengmai7698 | Cultivar | Henan | 140 | Xinchun18 | Cultivar | Xinjiang |
| 102 | Chu0608 | High-Generation Wheat Lines | Yunnan | 141 | Xinchun9 | Cultivar | Xinjiang |
| 103 | Xingchuan 233 | Cultivar | Xinjiang | 142 | Mianyang30 | Cultivar | Sichuan |
| 104 | Chuanmai 44 | Cultivar | Sichuan | 143 | Miannong7 | Cultivar | Sichuan |
| 105 | Anhui3 | Cultivar | Anhui | 144 | Xikemai1 | Cultivar | Sichuan |
| 106 | Chuanmai 52 | Cultivar | Sichuan | 145 | Lemai3 | Cultivar | Sichuan |
| 107 | Xingchun 22 | Cultivar | Xinjiang | 146 | Mianmai42 | Cultivar | Sichuan |
| 108 | 13-9045 | High-Generation Wheat Lines | Inner Mongolia | 147 | Jing01-7 | Cultivar | Anhui |
| 109 | Emai 11 | Cultivar | Hubei | 148 | Liangmai2 | Cultivar | Sichuan |
| 110 | Longmai65 | Cultivar | Heilongjiang | 149 | Nan30-2 | Cultivar | Sichuan |
| 111 | M7723 | High-Generation Wheat Lines | Inner Mongolia | 150 | Chuanmai39 | Cultivar | Sichuan |
| 112 | H3015-S | High-Generation Wheat Lines | Inner Mongolia | 151 | Xinmai14 | Cultivar | Xinjiang |
| 113 | Bamai12 | Cultivar | Inner Mongolia | 152 | Chuanyu16 | Cultivar | Sichuan |
| 114 | Bafeng5 | Cultivar | Inner Mongolia | 153 | Xinchun16 | Cultivar | Xinjiang |
| 115 | Xiangmai35 | Cultivar | Hubei | 154 | Mianmai43 | Cultivar | Sichuan |
| 116 | Xinchun11 | Cultivar | Xinjiang | 155 | Yumai1 | Cultivar | Yunnan |
| 117 | Chuanyu21 | Cultivar | Sichuan | 156 | Kechengmai1 | Cultivar | Sichuan |
| 118 | Chuanmai45 | Cultivar | Sichuan | 157 | Xinchun13 | Cultivar | Xinjiang |
| 119 | Xinchun7 | Cultivar | Xinjiang | 158 | HH32 | High-Generation Wheat Lines | Inner Mongolia |

**S1 Table. The information of 306 wheat germplasm accessions. (Continued)**

| **No.** | **Variety (Strain) Name** | **Type** | **Source** | **No.** | **Variety (Strain) Name** | **Type** | **Source** |
| --- | --- | --- | --- | --- | --- | --- | --- |
| 159 | Chuanmai56 | Cultivar | Sichuan | 201 | Nongmai2 | Cultivar | Inner Mongolia |
| 160 | ChuanchongzU104 | Cultivar | Sichuan | 202 | Ningchun58 | Cultivar | Ningxia |
| 161 | Chuanmai38 | Cultivar | Sichuan | 203 | Nongmai4 | Cultivar | Inner Mongolia |
| 162 | Chuanmai33 | Cultivar | Sichuan | 204 | Nongmai5 | Cultivar | Inner Mongolia |
| 163 | Yangmai15 | Cultivar | Jiangsu | 205 | Nongmai016 | Cultivar | Inner Mongolia |
| 164 | Fumai2 | Cultivar | Jiangsu | 206 | Huaimai2015 | Cultivar | Jiangsu |
| 165 | Xinchun6 | Cultivar | Xinjiang | 207 | Weimai2015 | Cultivar | Jiangsu |
| 166 | Xiao05938 | Cultivar | Hubei | 208 | Weimai2221 | Cultivar | Jiangsu |
| 167 | Emai15 | Cultivar | Hubei | 209 | Weimai13 | Cultivar | Jiangsu |
| 168 | Xikemai5 | Cultivar | Sichuan | 210 | Weimai1716 | Cultivar | Jiangsu |
| 169 | Emai1425 | Cultivar | Hubei | 211 | Weimai2012 | Cultivar | Jiangsu |
| 170 | Chuannong27 | Cultivar | Sichuan | 212 | Ruichun1 | Cultivar | Gansu |
| 171 | Emai22 | Cultivar | Hubei | 213 | Longbaimai | Cultivar | Gansu |
| 172 | Chuanmai107 | Cultivar | Sichuan | 214 | Yongliang4 | Cultivar | Ningxia |
| 173 | Mianyang33 | Cultivar | Sichuan | 215 | Fengai20 | Cultivar | Shaanxi |
| 174 | Chuanmai36 | Cultivar | Sichuan | 216 | Bamai13 | Cultivar | Inner Mongolia |
| 175 | Chuanyu23 | Cultivar | Sichuan | 217 | Z21 | High-Generation Wheat Lines | Inner Mongolia |
| 176 | Mianmai38 | Cultivar | Sichuan | 218 | Nongda876 | Cultivar | Beijing |
| 177 | Jingmai49 | Cultivar | Hubei | 219 | Jiangmai9131 | Cultivar | Jiangsu |
| 178 | Huamai8 | Cultivar | Jiangsu | 220 | Zhongnongma  i4007 | Cultivar | Bijing |
| 179 | Jian3401 | High-Generation Wheat Lines | Jiangsu | 221 | Zhongyu1120 | Cultivar | Beijing |
| 180 | Zhengmai132 | Cultivar | Henan | 222 | Lunxuan66 | Cultivar | Beijing |
| 181 | Chuanyu27 | Cultivar | Sichuan | 223 | Ningmai9 | Cultivar | Ningxia |
| 182 | Fan1596 | Cultivar | Henan | 224 | Zhoumai24 | Cultivar | Henan |
| 183 | Xinong W5189 | Cultivar | Shaanxi | 225 | Luomai29 | Cultivar | Henan |
| 184 | Tutou | Cultivar | Shaanxi | 226 | Xinong511 | Cultivar | Shaanxi |
| 185 | Xinong905 | Cultivar | Shaanxi | 227 | Xinong529 | Cultivar | Shaanxi |
| 186 | Xinong892 | Cultivar | Shaanxi | 228 | Puxing0369 | Cultivar | Henan |
| 187 | Xinong894 | Cultivar | Shaanxi | 229 | Annong0629 | Cultivar | Anhui |
| 188 | Nong125 | Cultivar | Inner Mongolia | 230 | Ningmai14 | Cultivar | Ningxia |
| 189 | Xizi0836 | Cultivar | Shaanxi | 231 | Zhengmai136 | Cultivar | Henan |
| 190 | DB2115 | High-Generation Wheat Lines | Inner Mongolia | 232 | Cunmai11 | Cultivar | Henan |
| 191 | Heimai2 | Cultivar | Inner Mongolia | 233 | Yan99102 | High-Generation Wheat Lines | Shandong |
| 192 | Xiza2 | Cultivar | Inner Mongolia | 234 | Luo0741 | High-Generation Wheat Lines | Henan |
| 193 | Nong300 | Cultivar | Inner Mongolia | 235 | Zheng9023 | Cultivar | Henan |
| 194 | Xinong896 | Cultivar | Shaanxi | 236 | Ning0310 | Cultivar | Ningxia |
| 195 | Nong485 | Cultivar | Inner Mongolia | 237 | Yangmai9 | Cultivar | Jiangsu |
| 196 | Mengzi1 | Cultivar | Inner Mongolia | 238 | Shengkang2 | Cultivar | Jiangsu |
| 197 | Ning60 | Cultivar | Ningxia | 239 | Zhengmai1836 | Cultivar | Henan |
| 198 | Fengai14-Q4 | High-Generation Wheat Lines | Shaanxi | 240 | Zhoumai21 | Cultivar | Henan |
| 199 | Nongmai730 | Cultivar | Inner Mongolia | 241 | Jinuomai116 | Cultivar | Shandong |
| 200 | Xiza1 | Cultivar | Inner Mongolia | 242 | Nongmai176 | Cultivar | Jiangsu |

**S1 Table. The information of 306 wheat germplasm accessions. (Continued)**

| **No.** | **Variety (Strain) Name** | **Type** | **Source** | **No.** | **Variety (Strain) Name** | **Type** | **Source** |
| --- | --- | --- | --- | --- | --- | --- | --- |
| 243 | Bainong989 | Cultivar | Henan | 275 | Ningchun10 | Cultivar | Ningxia |
| 244 | Yang03G12 | High-Generation Wheat Lines | Jiangsu | 276 | Ningchun11 | Cultivar | Ningxia |
| 245 | Ruiquanmai24 | Cultivar | Shandong | 277 | Ningchun12 | Cultivar | Ningxia |
| 246 | Lianmaikang1 | High-Generation Wheat Lines | Jiangsu | 278 | Ningchun13 | Cultivar | Ningxia |
| 247 | Wanmai27 | Cultivar | Anhui | 279 | Ningchun14 | Cultivar | Ningxia |
| 248 | Luomai27 | Cultivar | Henan | 280 | Ningchun15 | Cultivar | Ningxia |
| 249 | Wanke102 | Cultivar | Anhui | 281 | Ningchun16 | Cultivar | Ningxia |
| 250 | Yangmai6 | Cultivar | Jiangsu | 282 | Ningchun17 | Cultivar | Ningxia |
| 251 | Yangmai11 | Cultivar | Jiangsu | 283 | Ningchun18 | Cultivar | Ningxia |
| 252 | Ningchun59 | Cultivar | Ningxia | 284 | Ningchun19 | Cultivar | Ningxia |
| 253 | Nongmai482 | Cultivar | Anhui | 285 | Ningchun20 | Cultivar | Ningxia |
| 254 | Ning3015 | Cultivar | Ningxia | 286 | Ningchun21 | Cultivar | Ningxia |
| 255 | Ning2038 | Cultivar | Ningxia | 287 | Ningchun22 | Cultivar | Ningxia |
| 256 | Shengmai198 | Cultivar | Shandong | 288 | Ningchun23 | Cultivar | Ningxia |
| 257 | Zilimai | Cultivar | Gansu | 289 | Ningchun24 | Cultivar | Ningxia |
| 258 | Jingzimai3 | Cultivar | Beijing | 290 | Ningchun27 | Cultivar | Ningxia |
| 259 | Jininglvmai | Cultivar | Shandong | 291 | Ningchun29 | Cultivar | Ningxia |
| 260 | Linglvmai9 | Cultivar | Gansu | 292 | Ningchun30 | Cultivar | Ningxia |
| 261 | Heijizimai439 | Cultivar | Hebei | 293 | Ningchun31 | Cultivar | Ningxia |
| 262 | Lan58 | Cultivar | Gansu | 294 | Ningchun32 | Cultivar | Ningxia |
| 263 | Mengzimai2 | Cultivar | Inner Mongolia | 295 | Ningchun34 | Cultivar | Ningxia |
| 264 | Nong3735 | Cultivar | Beijing | 296 | Ningchun35 | Cultivar | Ningxia |
| 265 | Qinzi4 | Cultivar | Shaanxi | 297 | Ningchun36 | Cultivar | Ningxia |
| 266 | Ningchun1 | Cultivar | Ningxia | 298 | Ningchun37 | Cultivar | Ningxia |
| 267 | Ningchun2 | Cultivar | Ningxia | 299 | Ningchun38 | Cultivar | Ningxia |
| 268 | Ningchun3 | Cultivar | Ningxia | 300 | Ningchun39 | Cultivar | Ningxia |
| 269 | Ningchun4 | Cultivar | Ningxia | 301 | Ningchun40 | Cultivar | Ningxia |
| 270 | Ningchun5 | Cultivar | Ningxia | 302 | Ningchun41 | Cultivar | Ningxia |
| 271 | Ningchun6 | Cultivar | Ningxia | 303 | Ningchun42 | Cultivar | Ningxia |
| 272 | Ningchun7 | Cultivar | Ningxia | 304 | Ningchun44 | Cultivar | Ningxia |
| 273 | Ningchun8 | Cultivar | Ningxia | 305 | Ningchun45 | Cultivar | Ningxia |
| 274 | Ningchun9 | Cultivar | Ningxia | 306 | Ningchun53 | Cultivar | Ningxia |
